# Supplementary material for: Adaptive CNN Ensemble for Complex Multispectral Image Analysis
Source: Hindawi journal article supplement (doi:10.1155/2020/8361989), 2020-04-15
Supplement: f1 [file 8361989.f1.zip]

Archive with 3 entries (3 files):
- 8361989.f1/Inference-Model-Coding.pdf
- 8361989.f1/Supplementary Material.pdf
- 8361989.f1/Training-Pipeline.pdf
