# Supplementary material for: Adaptive CNN Ensemble for Complex Multispectral Image Analysis
Source: Hindawi journal article supplement (doi:10.1155/2020/8361989), 2020-04-15
Supplement: f1 [file 8361989.f1.zip]

```
In [1]: import numpy as np
import matplotlib.pyplot as plt
import tensorflow as tf

import numpy as np # Linear algebra
import pandas as pd
from utils import *

import os
import numpy as np
from tempfile import TemporaryFile
import pandas as pd
import matplotlib.pyplot as plt
from tensorflow.keras.callbacks import TensorBoard, ModelCheckpoint
from tensorflow.keras.models import Sequential
from tensorflow.keras.layers import Dense, Dropout, Flatten, GaussianNoise
from tensorflow.keras.layers import Conv2D, MaxPooling2D
from tensorflow.keras.layers import BatchNormalization
from tensorflow.keras.preprocessing.image import ImageDataGenerator
from tensorflow.keras.regularizers import l1
```

```
In [2]: tf.enable_eager_execution()
```

This is the training pipeline:

-a classifier is trained for every channel

-to use this pipeline change to value of the variable "idc" bellow and run each cell

```
In [3]: idc = 0
```

```
In [4]: ### Loads in the channel
xtest_chan = np.load("channels/channel_{}_xtest.npy".format(idc))
xtrain_chan = np.load("channels/channel_{}_xtrain.npy".format(idc))

### NB: Labels for each channel are the same
ytest_chan = np.load("channels/channel_5_ytest.npy")
ytrain_chan = np.load("channels/channel_5_ytrain.npy")
```

```
In [5]: ### obtain predictions for one-hot encoding
ytrain = np.argmax(ytrain_chan, axis = 1)
ytest = np.argmax(ytest_chan, axis = 1)
```

```
In [6]: ### Crop and resize the images
### 140*140 center crop was done and the image was then resized to 50*50
im_size = 50
xtrain = np.array(crop_resize(xtrain_chan, 140, im_size)).reshape((xtrain_chan
.shape[0], im_size, im_size, 1))
xtest = np.array(crop_resize(xtest_chan, 140, im_size)).reshape((xtest_chan.sh
ape[0], im_size, im_size, 1))
```

```
In [7]: ### Display the image and labels for 5 images in the dataset  
i = 10 ###start index  
for x in range(5):  
    print(ytrain[x+i])  
    plt.imshow(xtrain[x+i].reshape(im_size,im_size))  
    plt.show()
```

2

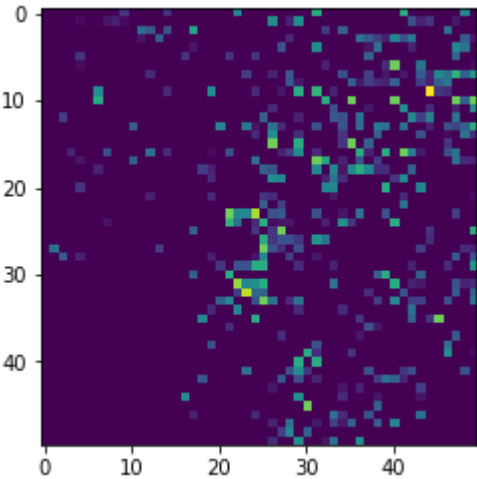

6

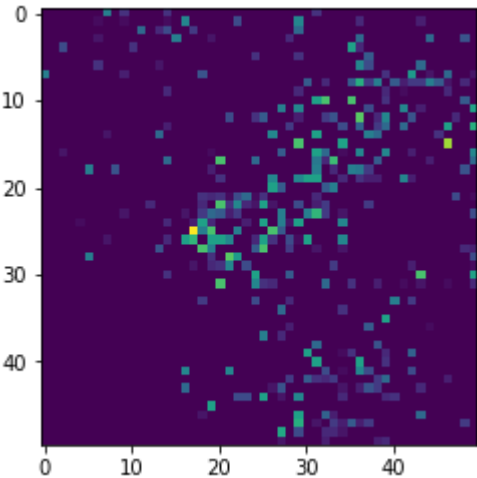

7

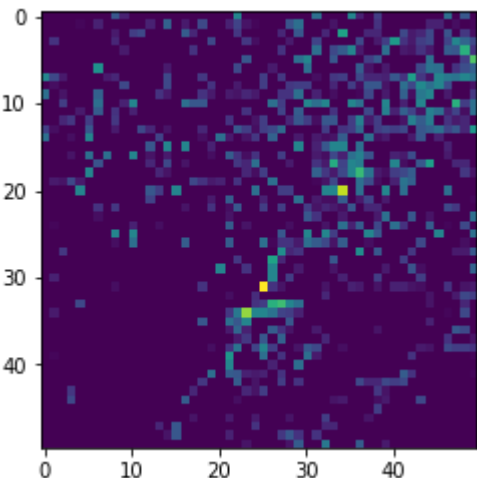

0

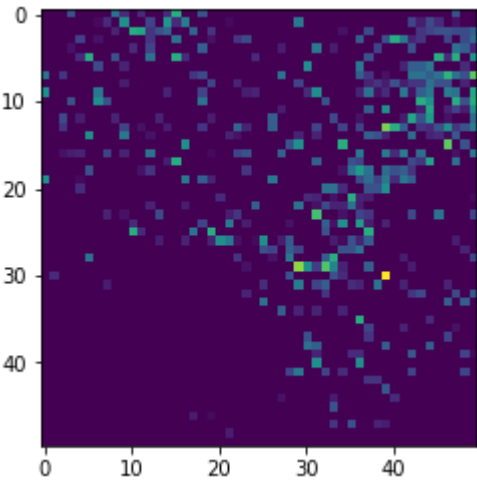

9

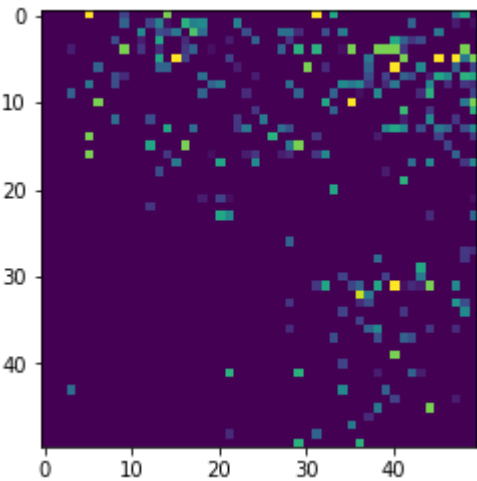

```
In [45]: ### Displays 5 images and their respective labels from the test set
i = 68
for x in range(5):
    print(ytest[x+i])
    plt.imshow(xtest[x+i].reshape(im_size,im_size))
    plt.show()
```

8

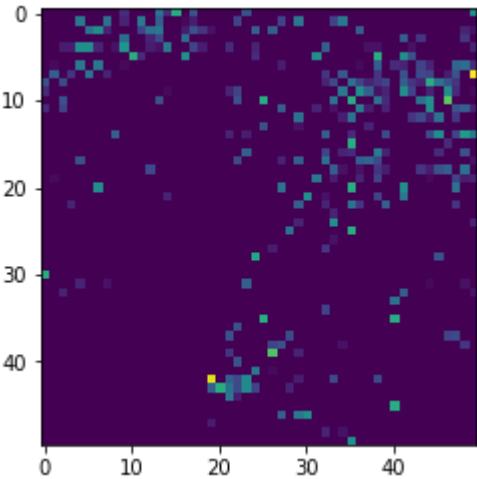

1

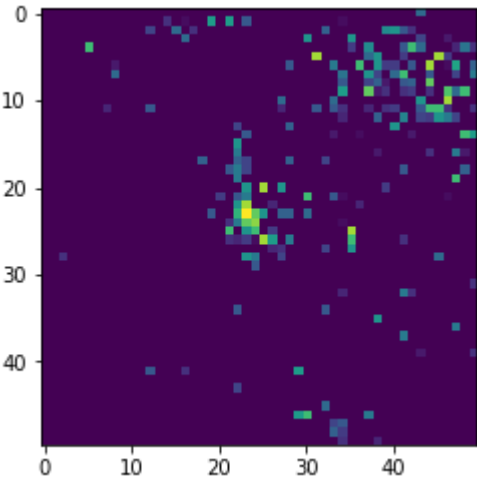

0

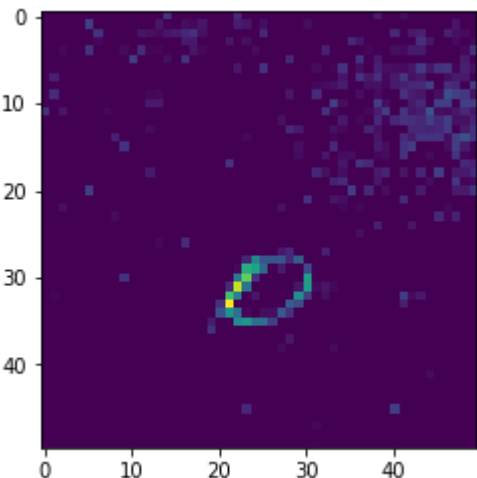

0

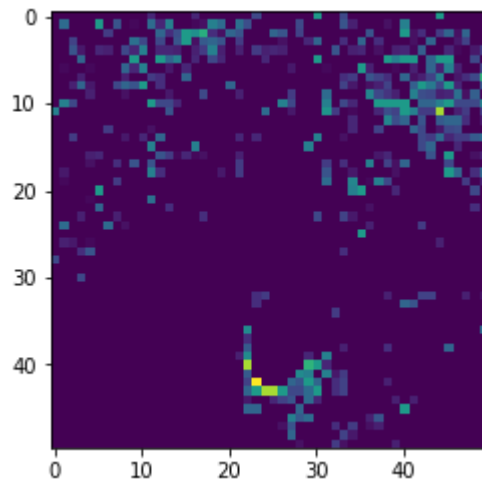

4

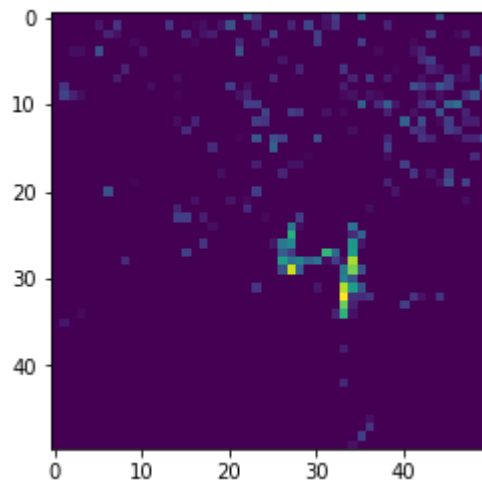

```
In [46]: print(xtrain.shape)
         print(ytrain.shape)
```

```
(477, 50, 50, 1)
(477,)
```

```
In [61]: im_size = 50
         batch_size = 120
         num_classes = 10
         lr = 0.001 ### Learning rate
         input_shape = ( im_size, im_size, 1)
         l1_lambda = 0.0003 ### L1 regularization Lambda parameter
```

In [71]: *### Creating model architecture*

```

he_init = tf.keras.initializers.VarianceScaling()
model = Sequential()
model.add(BatchNormalization(input_shape=input_shape))
model.add(Conv2D(64, (2, 2), kernel_regularizer=l1(l1_lambda), activation='elu',
                kernel_initializer =he_init))

model.add(GaussianNoise(0.01))
model.add(Conv2D(64, (2, 2), kernel_regularizer=l1(l1_lambda), activation='elu',
                kernel_initializer =he_init))

model.add(MaxPooling2D(pool_size=(2, 2)))
model.add(Dropout(0.2))
model.add(Conv2D(128, (2, 2), kernel_regularizer=l1(l1_lambda), activation='elu',
                kernel_initializer =he_init))

model.add(GaussianNoise(0.01))
model.add(Conv2D(128, (2, 2), kernel_regularizer=l1(l1_lambda), activation='elu',
                kernel_initializer =he_init))

model.add(MaxPooling2D(pool_size=(2, 2)))
model.add(Dropout(0.2))
model.add(Conv2D(256, (2, 2), kernel_regularizer=l1(l1_lambda), activation='elu',
                kernel_initializer =he_init))

model.add(GaussianNoise(0.1))
model.add(Conv2D(256, (2, 2), kernel_regularizer=l1(l1_lambda), activation='elu',
                kernel_initializer =he_init))

model.add(MaxPooling2D(pool_size=(2, 2)))
model.add(Dropout(0.2))

model.add(Flatten())
model.add(Dense(1024, activation='elu', kernel_regularizer=l1(l1_lambda), kernel_initializer =he_init))
model.add(Dropout(0.2))

model.add(Dense(1024, activation='elu', kernel_initializer =he_init))
model.add(Dropout(0.2))
model.add(GaussianNoise(0.01))
model.add(Dense(num_classes, activation='softmax', kernel_initializer =he_init))
model.summary()

```



| Layer (type)                                   | Output Shape        | Param # |
|------------------------------------------------|---------------------|---------|
| batch_normalization_v1_5 (Batch Normalization) | (None, 50, 50, 1)   | 4       |
| conv2d_30 (Conv2D)                             | (None, 49, 49, 64)  | 320     |
| gaussian_noise_15 (Gaussian Noise)             | (None, 49, 49, 64)  | 0       |
| conv2d_31 (Conv2D)                             | (None, 48, 48, 64)  | 16448   |
| max_pooling2d_15 (MaxPooling2D)                | (None, 24, 24, 64)  | 0       |
| dropout_25 (Dropout)                           | (None, 24, 24, 64)  | 0       |
| conv2d_32 (Conv2D)                             | (None, 23, 23, 128) | 32896   |
| gaussian_noise_16 (Gaussian Noise)             | (None, 23, 23, 128) | 0       |
| conv2d_33 (Conv2D)                             | (None, 22, 22, 128) | 65664   |
| max_pooling2d_16 (MaxPooling2D)                | (None, 11, 11, 128) | 0       |
| dropout_26 (Dropout)                           | (None, 11, 11, 128) | 0       |
| conv2d_34 (Conv2D)                             | (None, 10, 10, 256) | 131328  |
| gaussian_noise_17 (Gaussian Noise)             | (None, 10, 10, 256) | 0       |
| conv2d_35 (Conv2D)                             | (None, 9, 9, 256)   | 262400  |
| max_pooling2d_17 (MaxPooling2D)                | (None, 4, 4, 256)   | 0       |
| dropout_27 (Dropout)                           | (None, 4, 4, 256)   | 0       |
| flatten_5 (Flatten)                            | (None, 4096)        | 0       |
| dense_15 (Dense)                               | (None, 1024)        | 4195328 |
| dropout_28 (Dropout)                           | (None, 1024)        | 0       |
| dense_16 (Dense)                               | (None, 1024)        | 1049600 |
| dropout_29 (Dropout)                           | (None, 1024)        | 0       |
| gaussian_noise_18 (Gaussian Noise)             | (None, 1024)        | 0       |
| dense_17 (Dense)                               | (None, 10)          | 10250   |
| Total params: 5,764,238                        |                     |         |
| Trainable params: 5,764,236                    |                     |         |
| Non-trainable params: 2                        |                     |         |

```
In [72]: ### This loads in saved weights only run if the notebook some how restart and
you want to
### reinitialized trained weights
#model.load_weights("Models/model{}.h5".format(idc))
```

```
In [73]: from tensorflow.keras.preprocessing.image import ImageDataGenerator

datagen = ImageDataGenerator(#rotation_range = 5,
                             width_shift_range = [1, 5],
                             height_shift_range = [1, 5],
                             #brightness_range = (.1, 5),
                             shear_range = 5.0
                             )

datagen.fit(xtrain)
```

```
In [74]: path = "tf_keras_models/"
```

```
In [75]: opt = tf.keras.optimizers.Adam(lr)
model.compile(loss='categorical_crossentropy',
              optimizer=opt,
              metrics=['accuracy'])

#tensorboard = TensorBoard(log_dir='./Logs', write_graph=True)
#checkpoint = ModelCheckpoint(filepath=os.path.join(path, "model-{epoch:02d}.h5"))
"""
model.fit_generator(datagen.flow(train_data, train_labels,
                                batch_size=batch_size),
                    epochs=epochs,
                    verbose=1,
                    validation_data=(test_data, test_labels),
                    callbacks=[tensorboard])
"""
```

```
Out[75]: '\nmodel.fit_generator(datagen.flow(train_data, train_labels,\n      batc
h_size=batch_size),\n      epochs=epochs,\n      verbose=1,\n
validation_data=(test_data, test_labels),\n      callbacks=[tensorboard])
\n'
```

```
In [76]: epochs = 100
batch_size = 477
model.fit_generator(datagen.flow(xtrain, ytrain_chan, batch_size = batch_size
),
    epochs=epochs,
    verbose=1,
    validation_data=(xtest, ytest_chan),
    #callbacks=[ checkpointer]
)
# Any results you write to the current directory are saved as
```

Epoch 1/100  
236/236 [=====] - 2s 7ms/sample - loss: 27.4217 - acc: 0.3008  
1/1 [=====] - 12s 12s/step - loss: 23.6170 - acc: 0.8302 - val\_loss: 27.4217 - val\_acc: 0.3008  
Epoch 2/100  
236/236 [=====] - 1s 3ms/sample - loss: 26.0198 - acc: 0.2458  
1/1 [=====] - 4s 4s/step - loss: 25.7552 - acc: 0.3438 - val\_loss: 26.0198 - val\_acc: 0.2458  
Epoch 3/100  
236/236 [=====] - 1s 3ms/sample - loss: 25.0508 - acc: 0.3347  
1/1 [=====] - 4s 4s/step - loss: 25.5207 - acc: 0.2956 - val\_loss: 25.0508 - val\_acc: 0.3347  
Epoch 4/100  
236/236 [=====] - 1s 3ms/sample - loss: 24.1238 - acc: 0.3686  
1/1 [=====] - 4s 4s/step - loss: 24.4032 - acc: 0.3836 - val\_loss: 24.1238 - val\_acc: 0.3686  
Epoch 5/100  
236/236 [=====] - 1s 3ms/sample - loss: 23.1236 - acc: 0.3686  
1/1 [=====] - 4s 4s/step - loss: 23.8070 - acc: 0.3899 - val\_loss: 23.1236 - val\_acc: 0.3686  
Epoch 6/100  
236/236 [=====] - 1s 3ms/sample - loss: 22.0129 - acc: 0.4661  
1/1 [=====] - 4s 4s/step - loss: 22.5961 - acc: 0.4486 - val\_loss: 22.0129 - val\_acc: 0.4661  
Epoch 7/100  
236/236 [=====] - 1s 3ms/sample - loss: 21.3849 - acc: 0.4958  
1/1 [=====] - 4s 4s/step - loss: 21.4432 - acc: 0.5325 - val\_loss: 21.3849 - val\_acc: 0.4958  
Epoch 8/100  
236/236 [=====] - 1s 3ms/sample - loss: 20.7141 - acc: 0.5254  
1/1 [=====] - 4s 4s/step - loss: 20.7289 - acc: 0.5702 - val\_loss: 20.7141 - val\_acc: 0.5254  
Epoch 9/100  
236/236 [=====] - 0s 2ms/sample - loss: 20.3765 - acc: 0.4576  
1/1 [=====] - 4s 4s/step - loss: 20.0927 - acc: 0.5954 - val\_loss: 20.3765 - val\_acc: 0.4576  
Epoch 10/100  
236/236 [=====] - 1s 3ms/sample - loss: 19.9994 - acc: 0.4703  
1/1 [=====] - 4s 4s/step - loss: 19.6910 - acc: 0.5807 - val\_loss: 19.9994 - val\_acc: 0.4703  
Epoch 11/100  
236/236 [=====] - 1s 3ms/sample - loss: 20.0370 - acc: 0.5042  
1/1 [=====] - 4s 4s/step - loss: 19.2652 - acc: 0.6101 - val\_loss: 20.0370 - val\_acc: 0.5042  
Epoch 12/100  
236/236 [=====] - 1s 2ms/sample - loss: 19.1770 - acc:

```
c: 0.5339
1/1 [=====] - 4s 4s/step - loss: 18.9574 - acc: 0.61
84 - val_loss: 19.1770 - val_acc: 0.5339
Epoch 13/100
236/236 [=====] - 1s 3ms/sample - loss: 19.0163 - ac
c: 0.4958
1/1 [=====] - 4s 4s/step - loss: 18.1766 - acc: 0.69
60 - val_loss: 19.0163 - val_acc: 0.4958
Epoch 14/100
236/236 [=====] - 1s 3ms/sample - loss: 18.3620 - ac
c: 0.5636
1/1 [=====] - 4s 4s/step - loss: 18.0940 - acc: 0.60
80 - val_loss: 18.3620 - val_acc: 0.5636
Epoch 15/100
236/236 [=====] - 1s 3ms/sample - loss: 17.8803 - ac
c: 0.5466
1/1 [=====] - 5s 5s/step - loss: 17.5543 - acc: 0.66
25 - val_loss: 17.8803 - val_acc: 0.5466
Epoch 16/100
236/236 [=====] - 1s 3ms/sample - loss: 17.5605 - ac
c: 0.5127
1/1 [=====] - 4s 4s/step - loss: 17.0933 - acc: 0.70
86 - val_loss: 17.5605 - val_acc: 0.5127
Epoch 17/100
236/236 [=====] - 1s 3ms/sample - loss: 17.2718 - ac
c: 0.4958
1/1 [=====] - 4s 4s/step - loss: 16.7280 - acc: 0.67
30 - val_loss: 17.2718 - val_acc: 0.4958
Epoch 18/100
236/236 [=====] - 0s 2ms/sample - loss: 16.8437 - ac
c: 0.5212
1/1 [=====] - 4s 4s/step - loss: 16.4055 - acc: 0.64
78 - val_loss: 16.8437 - val_acc: 0.5212
Epoch 19/100
236/236 [=====] - 1s 3ms/sample - loss: 16.3762 - ac
c: 0.5466
1/1 [=====] - 4s 4s/step - loss: 15.9739 - acc: 0.70
23 - val_loss: 16.3762 - val_acc: 0.5466
Epoch 20/100
236/236 [=====] - 1s 3ms/sample - loss: 16.0858 - ac
c: 0.5212
1/1 [=====] - 4s 4s/step - loss: 15.5631 - acc: 0.72
96 - val_loss: 16.0858 - val_acc: 0.5212
Epoch 21/100
236/236 [=====] - 1s 3ms/sample - loss: 15.8890 - ac
c: 0.5212
1/1 [=====] - 4s 4s/step - loss: 15.1510 - acc: 0.76
10 - val_loss: 15.8890 - val_acc: 0.5212
Epoch 22/100
236/236 [=====] - 1s 3ms/sample - loss: 15.5157 - ac
c: 0.5551
1/1 [=====] - 4s 4s/step - loss: 14.8474 - acc: 0.71
70 - val_loss: 15.5157 - val_acc: 0.5551
Epoch 23/100
236/236 [=====] - 1s 3ms/sample - loss: 15.2092 - ac
c: 0.5720
1/1 [=====] - 4s 4s/step - loss: 14.5192 - acc: 0.73
```

79 - val\_loss: 15.2092 - val\_acc: 0.5720  
Epoch 24/100  
236/236 [=====] - 1s 3ms/sample - loss: 14.8783 - acc: 0.5720  
1/1 [=====] - 4s 4s/step - loss: 14.2168 - acc: 0.7128 - val\_loss: 14.8783 - val\_acc: 0.5720  
Epoch 25/100  
236/236 [=====] - 1s 2ms/sample - loss: 14.6348 - acc: 0.5381  
1/1 [=====] - 4s 4s/step - loss: 13.8165 - acc: 0.7673 - val\_loss: 14.6348 - val\_acc: 0.5381  
Epoch 26/100  
236/236 [=====] - 1s 3ms/sample - loss: 14.2326 - acc: 0.5720  
1/1 [=====] - 5s 5s/step - loss: 13.6354 - acc: 0.7358 - val\_loss: 14.2326 - val\_acc: 0.5720  
Epoch 27/100  
236/236 [=====] - 1s 3ms/sample - loss: 13.9678 - acc: 0.5466  
1/1 [=====] - 4s 4s/step - loss: 13.2666 - acc: 0.7589 - val\_loss: 13.9678 - val\_acc: 0.5466  
Epoch 28/100  
236/236 [=====] - 1s 3ms/sample - loss: 13.6598 - acc: 0.5508  
1/1 [=====] - 4s 4s/step - loss: 12.9755 - acc: 0.7547 - val\_loss: 13.6598 - val\_acc: 0.5508  
Epoch 29/100  
236/236 [=====] - 1s 2ms/sample - loss: 13.4319 - acc: 0.5297  
1/1 [=====] - 4s 4s/step - loss: 12.6311 - acc: 0.8050 - val\_loss: 13.4319 - val\_acc: 0.5297  
Epoch 30/100  
236/236 [=====] - 1s 3ms/sample - loss: 13.1376 - acc: 0.5551  
1/1 [=====] - 5s 5s/step - loss: 12.4395 - acc: 0.7799 - val\_loss: 13.1376 - val\_acc: 0.5551  
Epoch 31/100  
236/236 [=====] - 1s 2ms/sample - loss: 12.8185 - acc: 0.5593  
1/1 [=====] - 4s 4s/step - loss: 12.1964 - acc: 0.7757 - val\_loss: 12.8185 - val\_acc: 0.5593  
Epoch 32/100  
236/236 [=====] - 1s 3ms/sample - loss: 12.6065 - acc: 0.5424  
1/1 [=====] - 4s 4s/step - loss: 11.9041 - acc: 0.7799 - val\_loss: 12.6065 - val\_acc: 0.5424  
Epoch 33/100  
236/236 [=====] - 1s 2ms/sample - loss: 12.3878 - acc: 0.5339  
1/1 [=====] - 4s 4s/step - loss: 11.7097 - acc: 0.7883 - val\_loss: 12.3878 - val\_acc: 0.5339  
Epoch 34/100  
236/236 [=====] - 1s 3ms/sample - loss: 12.1870 - acc: 0.5636  
1/1 [=====] - 5s 5s/step - loss: 11.4717 - acc: 0.7862 - val\_loss: 12.1870 - val\_acc: 0.5636  
Epoch 35/100

```
236/236 [=====] - 1s 2ms/sample - loss: 11.9571 - acc: 0.5720
1/1 [=====] - 4s 4s/step - loss: 11.2141 - acc: 0.8008 - val_loss: 11.9571 - val_acc: 0.5720
Epoch 36/100
236/236 [=====] - 1s 3ms/sample - loss: 11.6927 - acc: 0.5508
1/1 [=====] - 4s 4s/step - loss: 11.0170 - acc: 0.8155 - val_loss: 11.6927 - val_acc: 0.5508
Epoch 37/100
236/236 [=====] - 1s 3ms/sample - loss: 11.4793 - acc: 0.5381
1/1 [=====] - 4s 4s/step - loss: 10.8319 - acc: 0.7883 - val_loss: 11.4793 - val_acc: 0.5381
Epoch 38/100
236/236 [=====] - 1s 3ms/sample - loss: 11.2510 - acc: 0.5805
1/1 [=====] - 4s 4s/step - loss: 10.6308 - acc: 0.7883 - val_loss: 11.2510 - val_acc: 0.5805
Epoch 39/100
236/236 [=====] - 1s 3ms/sample - loss: 11.1499 - acc: 0.5551
1/1 [=====] - 4s 4s/step - loss: 10.4002 - acc: 0.8029 - val_loss: 11.1499 - val_acc: 0.5551
Epoch 40/100
236/236 [=====] - 1s 3ms/sample - loss: 10.9399 - acc: 0.5466
1/1 [=====] - 4s 4s/step - loss: 10.2108 - acc: 0.8218 - val_loss: 10.9399 - val_acc: 0.5466
Epoch 41/100
236/236 [=====] - 0s 2ms/sample - loss: 10.7843 - acc: 0.5551
1/1 [=====] - 4s 4s/step - loss: 9.9921 - acc: 0.8260 - val_loss: 10.7843 - val_acc: 0.5551
Epoch 42/100
236/236 [=====] - 1s 3ms/sample - loss: 10.5703 - acc: 0.5636
1/1 [=====] - 5s 5s/step - loss: 9.9108 - acc: 0.7841 - val_loss: 10.5703 - val_acc: 0.5636
Epoch 43/100
236/236 [=====] - 1s 3ms/sample - loss: 10.4225 - acc: 0.5678
1/1 [=====] - 4s 4s/step - loss: 9.7093 - acc: 0.8155 - val_loss: 10.4225 - val_acc: 0.5678
Epoch 44/100
236/236 [=====] - 1s 3ms/sample - loss: 10.2858 - acc: 0.5551
1/1 [=====] - 4s 4s/step - loss: 9.5221 - acc: 0.8197 - val_loss: 10.2858 - val_acc: 0.5551
Epoch 45/100
236/236 [=====] - 1s 3ms/sample - loss: 10.1342 - acc: 0.5466
1/1 [=====] - 4s 4s/step - loss: 9.3630 - acc: 0.8449 - val_loss: 10.1342 - val_acc: 0.5466
Epoch 46/100
236/236 [=====] - 1s 3ms/sample - loss: 9.9628 - acc: 0.5381
```

```
1/1 [=====] - 4s 4s/step - loss: 9.2264 - acc: 0.819
7 - val_loss: 9.9628 - val_acc: 0.5381
Epoch 47/100
236/236 [=====] - 1s 3ms/sample - loss: 9.7784 - ac
c: 0.5593
1/1 [=====] - 4s 4s/step - loss: 9.0681 - acc: 0.828
1 - val_loss: 9.7784 - val_acc: 0.5593
Epoch 48/100
236/236 [=====] - 1s 3ms/sample - loss: 9.6620 - ac
c: 0.5847
1/1 [=====] - 5s 5s/step - loss: 8.9047 - acc: 0.826
0 - val_loss: 9.6620 - val_acc: 0.5847
Epoch 49/100
236/236 [=====] - 1s 3ms/sample - loss: 9.5614 - ac
c: 0.5593
1/1 [=====] - 4s 4s/step - loss: 8.7983 - acc: 0.830
2 - val_loss: 9.5614 - val_acc: 0.5593
Epoch 50/100
236/236 [=====] - 1s 3ms/sample - loss: 9.4227 - ac
c: 0.5847
1/1 [=====] - 4s 4s/step - loss: 8.6614 - acc: 0.821
8 - val_loss: 9.4227 - val_acc: 0.5847
Epoch 51/100
236/236 [=====] - 1s 3ms/sample - loss: 9.2827 - ac
c: 0.5636
1/1 [=====] - 5s 5s/step - loss: 8.5511 - acc: 0.802
9 - val_loss: 9.2827 - val_acc: 0.5636
Epoch 52/100
236/236 [=====] - 1s 3ms/sample - loss: 9.1809 - ac
c: 0.5678
1/1 [=====] - 4s 4s/step - loss: 8.3947 - acc: 0.849
1 - val_loss: 9.1809 - val_acc: 0.5678
Epoch 53/100
236/236 [=====] - 1s 3ms/sample - loss: 9.1138 - ac
c: 0.5466
1/1 [=====] - 4s 4s/step - loss: 8.2952 - acc: 0.849
1 - val_loss: 9.1138 - val_acc: 0.5466
Epoch 54/100
236/236 [=====] - 1s 3ms/sample - loss: 9.0582 - ac
c: 0.5212
1/1 [=====] - 4s 4s/step - loss: 8.1852 - acc: 0.840
7 - val_loss: 9.0582 - val_acc: 0.5212
Epoch 55/100
236/236 [=====] - 1s 3ms/sample - loss: 8.9583 - ac
c: 0.5636
1/1 [=====] - 4s 4s/step - loss: 8.1143 - acc: 0.821
8 - val_loss: 8.9583 - val_acc: 0.5636
Epoch 56/100
236/236 [=====] - 1s 3ms/sample - loss: 8.8797 - ac
c: 0.5508
1/1 [=====] - 4s 4s/step - loss: 8.0041 - acc: 0.832
3 - val_loss: 8.8797 - val_acc: 0.5508
Epoch 57/100
236/236 [=====] - 1s 2ms/sample - loss: 8.7540 - ac
c: 0.5636
1/1 [=====] - 4s 4s/step - loss: 7.9364 - acc: 0.800
8 - val_loss: 8.7540 - val_acc: 0.5636
```



Epoch 58/100  
236/236 [=====] - 1s 2ms/sample - loss: 8.6521 - acc: 0.5593  
1/1 [=====] - 4s 4s/step - loss: 7.8355 - acc: 0.8155 - val\_loss: 8.6521 - val\_acc: 0.5593  
Epoch 59/100  
236/236 [=====] - 1s 3ms/sample - loss: 8.5620 - acc: 0.5593  
1/1 [=====] - 4s 4s/step - loss: 7.7053 - acc: 0.8302 - val\_loss: 8.5620 - val\_acc: 0.5593  
Epoch 60/100  
236/236 [=====] - 1s 3ms/sample - loss: 8.5303 - acc: 0.5381  
1/1 [=====] - 4s 4s/step - loss: 7.6147 - acc: 0.8449 - val\_loss: 8.5303 - val\_acc: 0.5381  
Epoch 61/100  
236/236 [=====] - 1s 3ms/sample - loss: 8.5018 - acc: 0.5339  
1/1 [=====] - 4s 4s/step - loss: 7.5783 - acc: 0.8071 - val\_loss: 8.5018 - val\_acc: 0.5339  
Epoch 62/100  
236/236 [=====] - 1s 3ms/sample - loss: 8.3359 - acc: 0.5593  
1/1 [=====] - 4s 4s/step - loss: 7.5463 - acc: 0.7987 - val\_loss: 8.3359 - val\_acc: 0.5593  
Epoch 63/100  
236/236 [=====] - 1s 3ms/sample - loss: 8.2272 - acc: 0.5381  
1/1 [=====] - 4s 4s/step - loss: 7.4203 - acc: 0.8407 - val\_loss: 8.2272 - val\_acc: 0.5381  
Epoch 64/100  
236/236 [=====] - 1s 2ms/sample - loss: 8.2067 - acc: 0.5593  
1/1 [=====] - 4s 4s/step - loss: 7.4000 - acc: 0.8008 - val\_loss: 8.2067 - val\_acc: 0.5593  
Epoch 65/100  
236/236 [=====] - 1s 3ms/sample - loss: 8.2436 - acc: 0.5381  
1/1 [=====] - 4s 4s/step - loss: 7.2934 - acc: 0.7987 - val\_loss: 8.2436 - val\_acc: 0.5381  
Epoch 66/100  
236/236 [=====] - 1s 3ms/sample - loss: 8.0825 - acc: 0.5508  
1/1 [=====] - 5s 5s/step - loss: 7.2862 - acc: 0.7757 - val\_loss: 8.0825 - val\_acc: 0.5508  
Epoch 67/100  
236/236 [=====] - 1s 3ms/sample - loss: 8.0425 - acc: 0.5551  
1/1 [=====] - 5s 5s/step - loss: 7.1247 - acc: 0.8218 - val\_loss: 8.0425 - val\_acc: 0.5551  
Epoch 68/100  
236/236 [=====] - 1s 2ms/sample - loss: 8.0089 - acc: 0.5339  
1/1 [=====] - 4s 4s/step - loss: 7.1261 - acc: 0.8008 - val\_loss: 8.0089 - val\_acc: 0.5339  
Epoch 69/100  
236/236 [=====] - 1s 2ms/sample - loss: 8.0046 - acc:

```
c: 0.5551
1/1 [=====] - 4s 4s/step - loss: 7.0292 - acc: 0.830
2 - val_loss: 8.0046 - val_acc: 0.5551
Epoch 70/100
236/236 [=====] - 1s 3ms/sample - loss: 7.9557 - ac
c: 0.5720
1/1 [=====] - 4s 4s/step - loss: 6.9305 - acc: 0.849
1 - val_loss: 7.9557 - val_acc: 0.5720
Epoch 71/100
236/236 [=====] - 1s 3ms/sample - loss: 7.9192 - ac
c: 0.5890
1/1 [=====] - 4s 4s/step - loss: 6.9119 - acc: 0.817
6 - val_loss: 7.9192 - val_acc: 0.5890
Epoch 72/100
236/236 [=====] - 1s 3ms/sample - loss: 7.8718 - ac
c: 0.5763
1/1 [=====] - 4s 4s/step - loss: 6.9137 - acc: 0.811
3 - val_loss: 7.8718 - val_acc: 0.5763
Epoch 73/100
236/236 [=====] - 1s 3ms/sample - loss: 7.8514 - ac
c: 0.5424
1/1 [=====] - 4s 4s/step - loss: 6.8453 - acc: 0.813
4 - val_loss: 7.8514 - val_acc: 0.5424
Epoch 74/100
236/236 [=====] - 1s 3ms/sample - loss: 7.7285 - ac
c: 0.5424
1/1 [=====] - 4s 4s/step - loss: 6.8059 - acc: 0.788
3 - val_loss: 7.7285 - val_acc: 0.5424
Epoch 75/100
236/236 [=====] - 1s 4ms/sample - loss: 7.7076 - ac
c: 0.5424
1/1 [=====] - 4s 4s/step - loss: 6.8157 - acc: 0.788
3 - val_loss: 7.7076 - val_acc: 0.5424
Epoch 76/100
236/236 [=====] - 1s 3ms/sample - loss: 7.6501 - ac
c: 0.5127
1/1 [=====] - 4s 4s/step - loss: 6.7140 - acc: 0.811
3 - val_loss: 7.6501 - val_acc: 0.5127
Epoch 77/100
236/236 [=====] - 1s 3ms/sample - loss: 7.7290 - ac
c: 0.5424
1/1 [=====] - 4s 4s/step - loss: 6.5929 - acc: 0.830
2 - val_loss: 7.7290 - val_acc: 0.5424
Epoch 78/100
236/236 [=====] - 1s 3ms/sample - loss: 7.5062 - ac
c: 0.5466
1/1 [=====] - 5s 5s/step - loss: 6.6909 - acc: 0.752
6 - val_loss: 7.5062 - val_acc: 0.5466
Epoch 79/100
236/236 [=====] - 1s 3ms/sample - loss: 7.4775 - ac
c: 0.5805
1/1 [=====] - 4s 4s/step - loss: 6.5402 - acc: 0.849
1 - val_loss: 7.4775 - val_acc: 0.5805
Epoch 80/100
236/236 [=====] - 1s 3ms/sample - loss: 7.3918 - ac
c: 0.5847
1/1 [=====] - 4s 4s/step - loss: 6.5769 - acc: 0.792
```

```
5 - val_loss: 7.3918 - val_acc: 0.5847
Epoch 81/100
236/236 [=====] - 1s 3ms/sample - loss: 7.4829 - acc: 0.5551
1/1 [=====] - 4s 4s/step - loss: 6.4756 - acc: 0.817
6 - val_loss: 7.4829 - val_acc: 0.5551
Epoch 82/100
236/236 [=====] - 1s 2ms/sample - loss: 7.4484 - acc: 0.5381
1/1 [=====] - 4s 4s/step - loss: 6.4918 - acc: 0.817
6 - val_loss: 7.4484 - val_acc: 0.5381
Epoch 83/100
236/236 [=====] - 1s 3ms/sample - loss: 7.3770 - acc: 0.5381
1/1 [=====] - 4s 4s/step - loss: 6.4477 - acc: 0.805
0 - val_loss: 7.3770 - val_acc: 0.5381
Epoch 84/100
236/236 [=====] - 1s 3ms/sample - loss: 7.3421 - acc: 0.5381
1/1 [=====] - 4s 4s/step - loss: 6.4254 - acc: 0.809
2 - val_loss: 7.3421 - val_acc: 0.5381
Epoch 85/100
236/236 [=====] - 1s 3ms/sample - loss: 7.3877 - acc: 0.5381
1/1 [=====] - 4s 4s/step - loss: 6.3241 - acc: 0.838
6 - val_loss: 7.3877 - val_acc: 0.5381
Epoch 86/100
236/236 [=====] - 1s 3ms/sample - loss: 7.4475 - acc: 0.5127
1/1 [=====] - 4s 4s/step - loss: 6.3387 - acc: 0.832
3 - val_loss: 7.4475 - val_acc: 0.5127
Epoch 87/100
236/236 [=====] - 1s 2ms/sample - loss: 7.4534 - acc: 0.5339
1/1 [=====] - 4s 4s/step - loss: 6.3400 - acc: 0.807
1 - val_loss: 7.4534 - val_acc: 0.5339
Epoch 88/100
236/236 [=====] - 1s 3ms/sample - loss: 7.3702 - acc: 0.5466
1/1 [=====] - 4s 4s/step - loss: 6.2741 - acc: 0.811
3 - val_loss: 7.3702 - val_acc: 0.5466
Epoch 89/100
236/236 [=====] - 1s 3ms/sample - loss: 7.3258 - acc: 0.5508
1/1 [=====] - 4s 4s/step - loss: 6.1855 - acc: 0.840
7 - val_loss: 7.3258 - val_acc: 0.5508
Epoch 90/100
236/236 [=====] - 1s 3ms/sample - loss: 7.1655 - acc: 0.5466
1/1 [=====] - 4s 4s/step - loss: 6.1941 - acc: 0.838
6 - val_loss: 7.1655 - val_acc: 0.5466
Epoch 91/100
236/236 [=====] - 1s 2ms/sample - loss: 7.2315 - acc: 0.5212
1/1 [=====] - 4s 4s/step - loss: 6.1511 - acc: 0.832
3 - val_loss: 7.2315 - val_acc: 0.5212
Epoch 92/100
```

```

236/236 [=====] - 0s 2ms/sample - loss: 7.2142 - acc: 0.5085
1/1 [=====] - 4s 4s/step - loss: 6.1725 - acc: 0.7945 - val_loss: 7.2142 - val_acc: 0.5085
Epoch 93/100
236/236 [=====] - 1s 3ms/sample - loss: 7.1464 - acc: 0.5085
1/1 [=====] - 4s 4s/step - loss: 6.1161 - acc: 0.8365 - val_loss: 7.1464 - val_acc: 0.5085
Epoch 94/100
236/236 [=====] - 0s 2ms/sample - loss: 7.1302 - acc: 0.5424
1/1 [=====] - 4s 4s/step - loss: 6.0432 - acc: 0.8260 - val_loss: 7.1302 - val_acc: 0.5424
Epoch 95/100
236/236 [=====] - 1s 3ms/sample - loss: 7.0941 - acc: 0.5593
1/1 [=====] - 4s 4s/step - loss: 6.0365 - acc: 0.8407 - val_loss: 7.0941 - val_acc: 0.5593
Epoch 96/100
236/236 [=====] - 1s 3ms/sample - loss: 7.1593 - acc: 0.5339
1/1 [=====] - 4s 4s/step - loss: 5.9892 - acc: 0.8512 - val_loss: 7.1593 - val_acc: 0.5339
Epoch 97/100
236/236 [=====] - 1s 3ms/sample - loss: 7.0502 - acc: 0.5551
1/1 [=====] - 4s 4s/step - loss: 5.9517 - acc: 0.8239 - val_loss: 7.0502 - val_acc: 0.5551
Epoch 98/100
236/236 [=====] - 1s 3ms/sample - loss: 6.9429 - acc: 0.5466
1/1 [=====] - 4s 4s/step - loss: 5.9446 - acc: 0.8491 - val_loss: 6.9429 - val_acc: 0.5466
Epoch 99/100
236/236 [=====] - 1s 2ms/sample - loss: 6.9183 - acc: 0.5466
1/1 [=====] - 4s 4s/step - loss: 5.9049 - acc: 0.8407 - val_loss: 6.9183 - val_acc: 0.5466
Epoch 100/100
236/236 [=====] - 1s 3ms/sample - loss: 7.0233 - acc: 0.5508
1/1 [=====] - 4s 4s/step - loss: 5.8821 - acc: 0.8281 - val_loss: 7.0233 - val_acc: 0.5508

```

Out[76]: <tensorflow.python.keras.callbacks.History at 0x7fd869164748>

```

In [33]: score = model.evaluate(xtest, ytest_chan, verbose=0)
print('Test loss:', score[0])
print('Test accuracy:', score[1])
pred = model.predict(xtest)

```

```

Test loss: 0.26396609564958995
Test accuracy: 0.970339

```

```
In [166]: ytest_chan.T.shape
```

```
Out[166]: (10, 236)
```

```
In [167]: pred.T.shape
```

```
Out[167]: (10, 236)
```

```
In [168]: print("-Confusion matrix")
confuse = tf.math.confusion_matrix(np.argmax(ytest_chan,axis = 1), np.argmax(p
red, axis = 1), num_classes = 10)
print(confuse)
```

```
tf.Tensor(
[[10  1  3  3  0  2  4  1  2  0]
 [ 0 18  1  1  1  2  0  0  1  1]
 [ 1  0 15  1  1  4  1  0  1  0]
 [ 0  0  1 14  1  6  0  1  0  0]
 [ 0  1  3  0 13  2  0  4  1  1]
 [ 0  0  3  2  0 12  4  0  1  0]
 [ 0  0  0  0  1  5 15  0  3  0]
 [ 0  2  0  3  1  3  3 15  0  1]
 [ 0  0  2  1  0  3  1  0 13  0]
 [ 0  3  0  0  2  1  0  3  1  9]], shape=(10, 10), dtype=int32)
```

```
In [169]: np.argmax(pred,axis = 1)
```

```
Out[169]: array([9, 5, 7, 2, 6, 2, 5, 1, 4, 5, 2, 4, 2, 5, 0, 6, 4, 5, 1, 6, 5, 3,
 5, 9, 5, 8, 4, 7, 5, 2, 6, 5, 6, 7, 7, 8, 0, 5, 7, 5, 7, 5, 5, 5,
 6, 3, 9, 9, 6, 1, 1, 8, 8, 4, 2, 3, 8, 5, 1, 5, 1, 2, 7, 5, 1, 3,
 6, 4, 2, 8, 0, 0, 9, 7, 7, 9, 5, 8, 6, 3, 3, 7, 6, 8, 0, 2, 8, 7,
 6, 7, 2, 1, 1, 6, 9, 2, 2, 7, 5, 4, 8, 3, 6, 2, 0, 5, 0, 2, 7, 4,
 8, 6, 2, 4, 2, 2, 3, 6, 8, 1, 3, 1, 8, 4, 2, 5, 7, 7, 3, 8, 3, 1,
 5, 1, 3, 6, 1, 3, 9, 7, 6, 0, 5, 3, 8, 6, 5, 9, 8, 7, 0, 1, 6, 2,
 3, 5, 9, 3, 6, 1, 7, 1, 5, 5, 3, 3, 6, 5, 5, 5, 5, 1, 1, 3, 5, 4,
 2, 8, 4, 6, 2, 4, 4, 0, 8, 8, 2, 6, 6, 2, 5, 7, 1, 4, 7, 4, 9, 1,
 2, 1, 1, 4, 6, 5, 3, 9, 5, 3, 5, 0, 3, 1, 4, 5, 6, 2, 6, 8, 8, 4,
 7, 8, 7, 2, 2, 2, 7, 3, 1, 4, 3, 6, 5, 3, 8, 5])
```

```
In [170]: np.argmax(ytest_chan, axis = 1)
```

```
Out[170]: array([9, 5, 4, 2, 6, 2, 8, 9, 2, 5, 2, 4, 5, 9, 0, 6, 9, 0, 1, 6, 8, 3,
 6, 7, 1, 8, 4, 7, 3, 2, 0, 5, 6, 3, 7, 2, 0, 3, 7, 5, 7, 5, 7, 5,
 8, 0, 1, 9, 6, 0, 9, 8, 8, 4, 2, 3, 8, 5, 1, 6, 1, 3, 7, 3, 1, 3,
 7, 4, 8, 1, 0, 0, 4, 4, 0, 9, 5, 8, 6, 3, 8, 7, 6, 0, 0, 8, 8, 7,
 6, 7, 4, 9, 1, 0, 9, 2, 2, 7, 3, 4, 9, 3, 6, 0, 0, 8, 2, 2, 9, 4,
 8, 7, 5, 4, 2, 1, 7, 6, 8, 1, 3, 1, 0, 6, 5, 2, 9, 7, 3, 8, 3, 1,
 6, 7, 3, 7, 1, 5, 9, 7, 5, 0, 0, 1, 8, 0, 2, 9, 4, 7, 0, 1, 0, 4,
 7, 4, 9, 3, 6, 1, 4, 1, 6, 5, 3, 0, 6, 3, 7, 6, 5, 1, 1, 3, 1, 7,
 4, 8, 4, 6, 2, 4, 9, 0, 8, 6, 0, 6, 5, 2, 2, 9, 7, 4, 7, 4, 9, 1,
 0, 1, 1, 3, 5, 3, 3, 9, 5, 7, 4, 0, 5, 1, 1, 5, 2, 2, 6, 5, 8, 4,
 4, 6, 7, 2, 2, 2, 7, 2, 4, 4, 0, 5, 7, 3, 6, 2])
```

Interesting the model is seeing everything in the validation set as one particular class overfitting----- high variance options

1 more data ? 2 regularization 3 more appropriate architecture

```
In [36]: ### Saving model  
model_json = model.to_json()  
with open("Models/model{}_json.json".format(idc), "w") as j_file:  
    j_file.write(model_json)
```

```
In [37]: ### Saving model's weights  
model.save_weights("Models/model{}.h5".format(idc))
```
